# Supplementary material for: Practical and regioselective amination of arenes using alkyl amines
Source: Springer Nature journal article supplement (doi:10.1038/s41557-019-0254-5), 2019-04-22
Supplement: 41557_2019_254_MOESM62_ESM.mol [file 41557_2019_254_MOESM62_ESM.mol]

nchem.18081670B-comp31.mol
  ChemDraw03121912302D

 16 18  0  0  0  0  0  0  0  0999 V2000
   -0.7141    0.4128    0.0000 N   0  0  0  0  0  0  0  0  0  0  0  0
   -0.7147   -0.4122    0.0000 C   0  0  0  0  0  0  0  0  0  0  0  0
   -1.4291   -0.8247    0.0000 C   0  0  0  0  0  0  0  0  0  0  0  0
   -1.4291   -1.6497    0.0000 C   0  0  0  0  0  0  0  0  0  0  0  0
   -0.7141   -2.0628    0.0000 C   0  0  0  0  0  0  0  0  0  0  0  0
    0.0003   -1.6503    0.0000 C   0  0  0  0  0  0  0  0  0  0  0  0
    0.0003   -0.8247    0.0000 C   0  0  0  0  0  0  0  0  0  0  0  0
    0.7147   -2.0628    0.0000 C   0  0  0  0  0  0  0  0  0  0  0  0
    1.4291   -1.6503    0.0000 C   0  0  0  0  0  0  0  0  0  0  0  0
    1.4291   -0.8253    0.0000 C   0  0  0  0  0  0  0  0  0  0  0  0
    0.7147   -0.4122    0.0000 C   0  0  0  0  0  0  0  0  0  0  0  0
    0.0002    0.8255    0.0000 C   0  0  0  0  0  0  0  0  0  0  0  0
    0.0002    1.6505    0.0000 C   0  0  0  0  0  0  0  0  0  0  0  0
   -0.7141    2.0628    0.0000 C   0  0  0  0  0  0  0  0  0  0  0  0
   -1.4285    1.6505    0.0000 C   0  0  0  0  0  0  0  0  0  0  0  0
   -1.4285    0.8255    0.0000 C   0  0  0  0  0  0  0  0  0  0  0  0
  1  2  1  0      
  2  3  2  0      
  3  4  1  0      
  4  5  2  0      
  5  6  1  0      
  6  7  2  0      
  7  2  1  0      
  6  8  1  0      
  8  9  2  0      
  9 10  1  0      
 10 11  2  0      
 11  7  1  0      
  1 12  1  0      
 12 13  1  0      
 13 14  1  0      
 14 15  1  0      
 15 16  1  0      
 16  1  1  0      
M  END
