# Supplementary material for: Practical and regioselective amination of arenes using alkyl amines
Source: Springer Nature journal article supplement (doi:10.1038/s41557-019-0254-5), 2019-04-22
Supplement: 41557_2019_254_MOESM165_ESM.mol [file 41557_2019_254_MOESM165_ESM.mol]

nchem.18081670B-comp71.mol
  ChemDraw03121912302D

 13 15  0  0  1  0  0  0  0  0999 V2000
    0.0000    0.0679    0.0000 N   0  0  0  0  0  0  0  0  0  0  0  0
    0.5834    0.6513    0.0000 C   0  0  0  0  0  0  0  0  0  0  0  0
    0.0000    1.2358    0.0000 C   0  0  0  0  0  0  0  0  0  0  0  0
   -0.5834    0.6518    0.0000 C   0  0  0  0  0  0  0  0  0  0  0  0
    0.5845    1.8186    0.0000 C   0  0  0  0  0  0  0  0  0  0  0  0
    0.0000    2.4019    0.0000 O   0  0  0  0  0  0  0  0  0  0  0  0
   -0.5834    1.8191    0.0000 C   0  0  0  0  0  0  0  0  0  0  0  0
    0.0000   -0.7573    0.0000 C   0  0  0  0  0  0  0  0  0  0  0  0
   -0.7122   -1.1684    0.0000 C   0  0  0  0  0  0  0  0  0  0  0  0
   -0.7122   -1.9908    0.0000 C   0  0  0  0  0  0  0  0  0  0  0  0
    0.0000   -2.4019    0.0000 C   0  0  0  0  0  0  0  0  0  0  0  0
    0.7122   -1.9908    0.0000 C   0  0  0  0  0  0  0  0  0  0  0  0
    0.7122   -1.1684    0.0000 C   0  0  0  0  0  0  0  0  0  0  0  0
 12 13  2  0      
 11 12  1  0      
 10 11  2  0      
  9 10  1  0      
  8  9  2  0      
  8 13  1  0      
  1  8  1  0      
  1  2  1  0      
  2  3  1  0      
  3  4  1  0      
  4  1  1  0      
  3  5  1  6      
  5  6  1  0      
  6  7  1  0      
  3  7  1  1      
M  STY  1   1 SUP
M  SLB  1   1   1
M  SAL   1  6   8   9  10  11  12  13
M  SBL   1  1   7
M  SMT   1 Ph
M  SBV   1   7    0.0000    0.8252
M  END
