# Supplementary material for: Practical and regioselective amination of arenes using alkyl amines
Source: Springer Nature journal article supplement (doi:10.1038/s41557-019-0254-5), 2019-04-22
Supplement: 41557_2019_254_MOESM210_ESM.mol [file 41557_2019_254_MOESM210_ESM.mol]

nchem.18081670B-comp90.mol
  ChemDraw03121912302D

 27 30  0  0  0  0  0  0  0  0999 V2000
   -1.8895    0.2358    0.0000 C   0  0  0  0  0  0  0  0  0  0  0  0
   -2.6039   -0.1773    0.0000 C   0  0  0  0  0  0  0  0  0  0  0  0
   -2.6039   -1.0023    0.0000 C   0  0  0  0  0  0  0  0  0  0  0  0
   -1.8895   -1.4148    0.0000 N   0  0  0  0  0  0  0  0  0  0  0  0
   -1.1751   -1.0017    0.0000 C   0  0  0  0  0  0  0  0  0  0  0  0
   -1.1751   -0.1767    0.0000 C   0  0  0  0  0  0  0  0  0  0  0  0
   -1.8883   -2.2404    0.0000 C   0  0  0  0  0  0  0  0  0  0  0  0
   -1.0891    2.2931    0.0000 C   0  0  0  0  0  0  0  0  0  0  0  0
   -0.2813    2.4627    0.0000 C   0  0  0  0  0  0  0  0  0  0  0  0
    0.1306    1.7483    0.0000 C   0  0  0  0  0  0  0  0  0  0  0  0
   -0.4217    1.1364    0.0000 C   0  0  0  0  0  0  0  0  0  0  0  0
   -1.7010    2.8454    0.0000 O   0  0  0  0  0  0  0  0  0  0  0  0
    0.1318    3.1777    0.0000 C   0  0  0  0  0  0  0  0  0  0  0  0
    0.9568    3.1765    0.0000 C   0  0  0  0  0  0  0  0  0  0  0  0
    1.3681    2.4615    0.0000 C   0  0  0  0  0  0  0  0  0  0  0  0
    0.9551    1.7477    0.0000 C   0  0  0  0  0  0  0  0  0  0  0  0
   -1.1751    1.4727    0.0000 C   0  0  0  0  0  0  0  0  0  0  0  0
   -1.8895    1.0602    0.0000 C   0  0  0  0  0  0  0  0  0  0  0  0
   -2.6033   -2.6523    0.0000 C   0  0  0  0  0  0  0  0  0  0  0  0
   -2.6033   -3.4773    0.0000 C   0  0  0  0  0  0  0  0  0  0  0  0
   -1.8883   -3.8904    0.0000 C   0  0  0  0  0  0  0  0  0  0  0  0
   -1.1733   -3.4773    0.0000 C   0  0  0  0  0  0  0  0  0  0  0  0
   -1.1733   -2.6523    0.0000 C   0  0  0  0  0  0  0  0  0  0  0  0
    1.3693    3.8904    0.0000 O   0  0  0  0  0  0  0  0  0  0  0  0
    0.9568    3.1788    0.0000 C   0  0  0  0  0  0  0  0  0  0  0  0
    2.1937    2.4610    0.0000 O   0  0  0  0  0  0  0  0  0  0  0  0
    2.6039    1.7488    0.0000 C   0  0  0  0  0  0  0  0  0  0  0  0
 24 25  1  0      
 14 24  1  0      
 26 27  1  0      
 15 26  1  0      
  1  2  1  0      
  2  3  1  0      
  3  4  1  0      
  4  5  1  0      
  5  6  1  0      
  6  1  1  0      
  4  7  1  0      
  1 18  1  0      
 17  8  1  0      
  8  9  1  0      
  9 10  2  0      
 10 11  1  0      
 11 17  1  0      
  8 12  2  0      
  9 13  1  0      
 13 14  2  0      
 14 15  1  0      
 15 16  2  0      
 16 10  1  0      
 17 18  1  0      
  7 19  2  0      
 19 20  1  0      
 20 21  2  0      
 21 22  1  0      
 22 23  2  0      
 23  7  1  0      
M  STY  1   1 SUP
M  SLB  1   1   1
M  SAL   1  2  24  25
M  SBL   1  1   2
M  SMT   1 OMe
M  SBV   1   2   -0.4125   -0.7139
M  STY  1   2 SUP
M  SLB  1   2   2
M  SAL   2  2  26  27
M  SBL   2  1   4
M  SMT   2 OMe
M  SBV   2   4   -0.8256    0.0006
M  END
