# Supplementary material for: Practical and regioselective amination of arenes using alkyl amines
Source: Springer Nature journal article supplement (doi:10.1038/s41557-019-0254-5), 2019-04-22
Supplement: 41557_2019_254_MOESM220_ESM.mol [file 41557_2019_254_MOESM220_ESM.mol]

nchem.18081670B-comp94.mol
  ChemDraw03121912302D

 28 33  0  0  1  0  0  0  0  0999 V2000
    1.5789    0.3873    0.0000 C   0  0  0  0  0  0  0  0  0  0  0  0
    1.5789    1.4415    0.0000 C   0  0  0  0  0  0  0  0  0  0  0  0
    0.7545    0.3873    0.0000 C   0  0  0  0  0  0  0  0  0  0  0  0
   -0.0711    0.3873    0.0000 C   0  0  0  0  0  0  0  0  0  0  0  0
   -0.4836   -0.3271    0.0000 C   0  0  0  0  0  0  0  0  0  0  0  0
   -0.0711   -1.0416    0.0000 C   0  0  0  0  0  0  0  0  0  0  0  0
    0.7545   -1.0416    0.0000 C   0  0  0  0  0  0  0  0  0  0  0  0
    1.1664   -0.3271    0.0000 C   0  0  0  0  0  0  0  0  0  0  0  0
    1.9914   -0.3271    0.0000 C   0  0  0  0  0  0  0  0  0  0  0  0
    2.4045    0.3873    0.0000 C   0  0  0  0  0  0  0  0  0  0  0  0
    1.9914    1.1017    0.0000 C   0  0  0  0  0  0  0  0  0  0  0  0
    1.1664    1.1017    0.0000 C   0  0  0  0  0  0  0  0  0  0  0  0
    2.4045   -1.0416    0.0000 C   0  0  0  0  0  0  0  0  0  0  0  0
    3.2289   -1.0416    0.0000 C   0  0  0  0  0  0  0  0  0  0  0  0
    3.6414   -0.3271    0.0000 C   0  0  0  0  0  0  0  0  0  0  0  0
    3.2289    0.3873    0.0000 C   0  0  0  0  0  0  0  0  0  0  0  0
   -1.3080   -0.3271    0.0000 N   0  0  0  0  0  0  0  0  0  0  0  0
    2.8543    1.1779    0.0000 H   0  0  0  0  0  0  0  0  0  0  0  0
    2.4045    1.8540    0.0000 N   0  0  0  0  0  0  0  0  0  0  0  0
   -1.8914    0.2562    0.0000 C   0  0  0  0  0  0  0  0  0  0  0  0
   -2.4747   -0.3271    0.0000 C   0  0  0  0  0  0  0  0  0  0  0  0
   -1.8914   -0.9105    0.0000 C   0  0  0  0  0  0  0  0  0  0  0  0
   -3.0581    0.2562    0.0000 C   0  0  0  0  0  0  0  0  0  0  0  0
   -3.6414   -0.3271    0.0000 O   0  0  0  0  0  0  0  0  0  0  0  0
   -3.0581   -0.9105    0.0000 C   0  0  0  0  0  0  0  0  0  0  0  0
   -0.4836   -1.7566    0.0000 O   0  0  0  0  0  0  0  0  0  0  0  0
   -0.0728   -2.4681    0.0000 C   0  0  0  0  0  0  0  0  0  0  0  0
    2.9545    2.4681    0.0000 C   0  0  0  0  0  0  0  0  0  0  0  0
 26 27  1  0      
  6 26  1  0      
 19 28  1  0      
  1  2  1  0      
  3  4  2  0      
  4  5  1  0      
  5  6  2  0      
  6  7  1  0      
  7  8  2  0      
  8  3  1  0      
  8  9  1  0      
  9 10  1  0      
 10 11  1  0      
 11 12  1  0      
 12  3  1  0      
  9 13  1  0      
 13 14  1  0      
 14 15  1  0      
 15 16  1  0      
 16 10  1  0      
  5 17  1  0      
 10 18  1  6      
 11 19  1  6      
  9  1  1  6      
  2 19  1  0      
 17 20  1  0      
 20 21  1  0      
 21 22  1  0      
 22 17  1  0      
 21 23  1  6      
 23 24  1  0      
 24 25  1  0      
 21 25  1  1      
M  STY  1   1 SUP
M  SLB  1   1   1
M  SAL   1  2  26  27
M  SBL   1  1   2
M  SMT   1 OMe
M  SBV   1   2    0.4125    0.7150
M  STY  1   2 SUP
M  SLB  1   2   2
M  SAL   2  1  28
M  SBL   2  1   3
M  SMT   2 Me
M  SBV   2   3   -0.5500   -0.6142
M  END
