# Supplementary material for: Practical and regioselective amination of arenes using alkyl amines
Source: Springer Nature journal article supplement (doi:10.1038/s41557-019-0254-5), 2019-04-22
Supplement: 41557_2019_254_MOESM223_ESM.mol [file 41557_2019_254_MOESM223_ESM.mol]

nchem.18081670B-comp95.mol
  ChemDraw03121912302D

 21 22  0  0  1  0  0  0  0  0999 V2000
   -1.5787   -0.8147    0.0000 N   0  0  0  0  0  0  0  0  0  0  0  0
   -0.8643   -0.4022    0.0000 C   0  0  0  0  0  0  0  0  0  0  0  0
   -0.8643    0.4229    0.0000 C   0  0  0  0  0  0  0  0  0  0  0  0
   -0.1498    0.8354    0.0000 C   0  0  0  0  0  0  0  0  0  0  0  0
    0.5646    0.4229    0.0000 C   0  0  0  0  0  0  0  0  0  0  0  0
    1.2791    0.8354    0.0000 C   0  0  0  0  0  0  0  0  0  0  0  0
    1.2791    1.6604    0.0000 C   0  0  0  0  0  0  0  0  0  0  0  0
    0.5646    2.0730    0.0000 C   0  0  0  0  0  0  0  0  0  0  0  0
   -0.1498    1.6604    0.0000 C   0  0  0  0  0  0  0  0  0  0  0  0
    1.9941    2.0730    0.0000 N   0  0  0  0  0  0  0  0  0  0  0  0
    2.7910    1.8592    0.0000 C   0  0  0  0  0  0  0  0  0  0  0  0
    3.0048    2.6560    0.0000 C   0  0  0  0  0  0  0  0  0  0  0  0
    2.2079    2.8698    0.0000 C   0  0  0  0  0  0  0  0  0  0  0  0
   -2.2932    0.4200    0.0000 O   0  0  0  0  0  0  0  0  0  0  0  0
   -2.2932   -0.4022    0.0000 C   0  0  0  0  0  0  0  0  0  0  0  0
   -3.0048   -0.8135    0.0000 C   0  0  0  0  0  0  0  0  0  0  0  0
   -0.1498   -0.8147    0.0000 C   0  0  0  0  0  0  0  0  0  0  0  0
    0.5618   -0.4033    0.0000 O   0  0  0  0  0  0  0  0  0  0  0  0
   -0.1498   -1.6368    0.0000 O   0  0  0  0  0  0  0  0  0  0  0  0
    0.5618   -2.8698    0.0000 C   0  0  0  0  0  0  0  0  0  0  0  0
    0.5618   -2.0476    0.0000 C   0  0  0  0  0  0  0  0  0  0  0  0
 15 16  1  0      
 14 15  2  0      
  1 15  1  0      
 20 21  1  0      
 19 21  1  0      
 17 18  2  0      
 17 19  1  0      
  2 17  1  0      
  1  2  1  0      
  2  3  1  1      
  3  4  1  0      
  4  5  2  0      
  5  6  1  0      
  6  7  2  0      
  7  8  1  0      
  8  9  2  0      
  9  4  1  0      
  7 10  1  0      
 10 11  1  0      
 11 12  1  0      
 12 13  1  0      
 13 10  1  0      
M  STY  1   1 SUP
M  SLB  1   1   1
M  SAL   1  3  14  15  16
M  SBL   1  1   3
M  SMT   1 Ac
M  SBV   1   3    0.7145   -0.4125
M  STY  1   2 SUP
M  SLB  1   2   2
M  SAL   2  5  17  18  19  20  21
M  SBL   2  1   8
M  SMT   2 CO2Et
M  SBV   2   8   -0.7145    0.4125
M  END
