# Supplementary material for: Practical and regioselective amination of arenes using alkyl amines
Source: Springer Nature journal article supplement (doi:10.1038/s41557-019-0254-5), 2019-04-22
Supplement: 41557_2019_254_MOESM244_ESM.mol [file 41557_2019_254_MOESM244_ESM.mol]

nchem.18081670B-comp102.mol
  ChemDraw03121912302D

 20 22  0  0  1  0  0  0  0  0999 V2000
    0.2647    2.3705    0.0000 C   0  0  0  0  0  0  0  0  0  0  0  0
    1.0898    2.3705    0.0000 N   0  0  0  0  0  0  0  0  0  0  0  0
    0.0103    1.5860    0.0000 C   0  0  0  0  0  0  0  0  0  0  0  0
    0.6773    1.1007    0.0000 N   0  0  0  0  0  0  0  0  0  0  0  0
    1.3454    1.5860    0.0000 C   0  0  0  0  0  0  0  0  0  0  0  0
   -0.7747    1.3311    0.0000 C   0  0  0  0  0  0  0  0  0  0  0  0
   -0.2200    3.0380    0.0000 O   0  0  0  0  0  0  0  0  0  0  0  0
   -0.9460    0.5243    0.0000 C   0  0  0  0  0  0  0  0  0  0  0  0
   -1.7310    0.2693    0.0000 C   0  0  0  0  0  0  0  0  0  0  0  0
   -1.9023   -0.5375    0.0000 C   0  0  0  0  0  0  0  0  0  0  0  0
   -1.2892   -1.0898    0.0000 C   0  0  0  0  0  0  0  0  0  0  0  0
   -0.5048   -0.8348    0.0000 C   0  0  0  0  0  0  0  0  0  0  0  0
   -0.3329   -0.0281    0.0000 C   0  0  0  0  0  0  0  0  0  0  0  0
   -1.4611   -1.8972    0.0000 N   0  0  0  0  0  0  0  0  0  0  0  0
   -2.1527   -2.3464    0.0000 C   0  0  0  0  0  0  0  0  0  0  0  0
   -1.7035   -3.0380    0.0000 C   0  0  0  0  0  0  0  0  0  0  0  0
   -1.0113   -2.5888    0.0000 C   0  0  0  0  0  0  0  0  0  0  0  0
    1.5751    3.0380    0.0000 C   0  0  0  0  0  0  0  0  0  0  0  0
    1.8977    0.9729    0.0000 C   0  0  0  0  0  0  0  0  0  0  0  0
    2.1527    1.7574    0.0000 C   0  0  0  0  0  0  0  0  0  0  0  0
  2 18  1  0      
  5 19  1  1      
  5 20  1  6      
  1  2  1  0      
  1  3  1  0      
  3  4  1  0      
  4  5  1  0      
  5  2  1  0      
  3  6  1  1      
  1  7  2  0      
  6  8  1  0      
  8  9  2  0      
  9 10  1  0      
 10 11  2  0      
 11 12  1  0      
 12 13  2  0      
 13  8  1  0      
 11 14  1  0      
 14 15  1  0      
 15 16  1  0      
 16 17  1  0      
 17 14  1  0      
M  STY  1   1 SUP
M  SLB  1   1   1
M  SAL   1  1  18
M  SBL   1  1   1
M  SMT   1 Me
M  SBV   1   1   -0.4853   -0.6675
M  STY  1   2 SUP
M  SLB  1   2   2
M  SAL   2  1  19
M  SBL   2  1   2
M  SMT   2 Me
M  SBV   2   2   -0.5524    0.6131
M  STY  1   3 SUP
M  SLB  1   3   3
M  SAL   3  1  20
M  SBL   3  1   3
M  SMT   3 Me
M  SBV   3   3   -0.8073   -0.1713
M  END
