# Supplementary material for: Practical and regioselective amination of arenes using alkyl amines
Source: Springer Nature journal article supplement (doi:10.1038/s41557-019-0254-5), 2019-04-22
Supplement: 41557_2019_254_MOESM250_ESM.mol [file 41557_2019_254_MOESM250_ESM.mol]

nchem.18081670B-comp104.mol
  ChemDraw03121912302D

 29 33  0  0  1  0  0  0  0  0999 V2000
   -2.0742    0.7729    0.0000 C   0  0  0  0  0  0  0  0  0  0  0  0
   -2.7892    0.3609    0.0000 C   0  0  0  0  0  0  0  0  0  0  0  0
   -2.7892   -0.4641    0.0000 C   0  0  0  0  0  0  0  0  0  0  0  0
   -2.0742   -0.8771    0.0000 C   0  0  0  0  0  0  0  0  0  0  0  0
   -1.3598   -0.4641    0.0000 C   0  0  0  0  0  0  0  0  0  0  0  0
   -1.3598    0.3609    0.0000 C   0  0  0  0  0  0  0  0  0  0  0  0
   -2.0742   -1.7016    0.0000 N   0  0  0  0  0  0  0  0  0  0  0  0
   -1.3598   -2.1141    0.0000 C   0  0  0  0  0  0  0  0  0  0  0  0
   -0.6454   -1.7016    0.0000 C   0  0  0  0  0  0  0  0  0  0  0  0
   -0.6454   -0.8771    0.0000 C   0  0  0  0  0  0  0  0  0  0  0  0
    0.0805    0.2790    0.0000 O   0  0  0  0  0  0  0  0  0  0  0  0
    0.7840   -0.8771    0.0000 C   0  0  0  0  0  0  0  0  0  0  0  0
    0.0690   -0.4641    0.0000 C   0  0  0  0  0  0  0  0  0  0  0  0
    0.7840   -1.7016    0.0000 H   0  0  0  0  0  0  0  0  0  0  0  0
    1.5810   -0.6629    0.0000 N   0  0  0  0  0  0  0  0  0  0  0  0
    2.3767   -0.8771    0.0000 C   0  0  0  0  0  0  0  0  0  0  0  0
    1.1960   -0.1627    0.0000 C   0  0  0  0  0  0  0  0  0  0  0  0
    2.7892   -0.1627    0.0000 C   0  0  0  0  0  0  0  0  0  0  0  0
    1.9935    0.0516    0.0000 C   0  0  0  0  0  0  0  0  0  0  0  0
    1.5810    0.1621    0.0000 C   0  0  0  0  0  0  0  0  0  0  0  0
    1.9935    0.8766    0.0000 C   0  0  0  0  0  0  0  0  0  0  0  0
    1.2785    1.2885    0.0000 C   0  0  0  0  0  0  0  0  0  0  0  0
   -0.4449    0.8594    0.0000 N   0  0  0  0  0  0  0  0  0  0  0  0
    0.3745    0.7637    0.0000 C   0  0  0  0  0  0  0  0  0  0  0  0
    0.4702    1.5830    0.0000 C   0  0  0  0  0  0  0  0  0  0  0  0
   -0.3493    1.6793    0.0000 C   0  0  0  0  0  0  0  0  0  0  0  0
   -2.7864    2.0098    0.0000 C   0  0  0  0  0  0  0  0  0  0  0  0
   -2.0742    1.5984    0.0000 O   0  0  0  0  0  0  0  0  0  0  0  0
    1.2785    2.1141    0.0000 C   0  0  0  0  0  0  0  0  0  0  0  0
 27 28  1  0      
  1 28  1  0      
 22 29  1  0      
  1  2  2  0      
  2  3  1  0      
  3  4  2  0      
  4  5  1  0      
  5  6  2  0      
  6  1  1  0      
  4  7  1  0      
  7  8  2  0      
  8  9  1  0      
  9 10  2  0      
 10  5  1  0      
 10 13  1  0      
 13 11  1  6      
 12 13  1  0      
 12 14  1  0      
 12 15  1  0      
 15 16  1  0      
 12 17  1  0      
 16 18  1  0      
 17 19  1  0      
 19 18  1  0      
 15 20  1  0      
 19 21  1  0      
 20 21  1  0      
 21 22  1  0      
  6 23  1  0      
 23 24  1  0      
 24 25  1  0      
 25 26  1  0      
 26 23  1  0      
M  STY  1   1 SUP
M  SLB  1   1   1
M  SAL   1  2  27  28
M  SBL   1  1   2
M  SMT   1 MeO
M  SBV   1   2    0.0000   -0.8256
M  STY  1   2 SUP
M  SLB  1   2   2
M  SAL   2  1  29
M  SBL   2  1   3
M  SMT   2 Me
M  SBV   2   3    0.0000   -0.8256
M  END
